# Supplementary material for: Natural variation in BnaA07.MKK9 confers resistance to Sclerotinia stem rot in oilseed rape
Source: PubMed Central journal article supplement (PMC11176195; doi:10.1038/s41467-024-49504-6), 2024-06-13
Supplement: 41467_2024_49504_MOESM3_ESM.pdf [file 41467_2024_49504_MOESM3_ESM.pdf]

## Description of Additional Supplementary Files

### **Supplementary Data Legends**

**Supplementary Data 1:** List of 322 accessions for genome-wide association studies in this study.

**Supplementary Data 2:** Genotyping of BnaMKK9 mutants and their transmission to T1, T2, and T4 generations.

**Supplementary Data 3:** Detection of potential offtarget sites at each sgRNA target site of Bnamkk9 quadruple mutants (#5 and #7) in T4 progenies.

**Supplementary Data 4:** Agronomic traits of the J9712 and Bnamkk9 mutants in the experimental field.

**Supplementary Data 5:** All primers used in this study.
