# Supplementary material for: Natural variation in BnaA07.MKK9 confers resistance to Sclerotinia stem rot in oilseed rape
Source: PubMed Central journal article supplement (PMC11176195; doi:10.1038/s41467-024-49504-6), 2024-06-13
Supplement: 41467_2024_49504_MOESM9_ESM.pdf [file 41467_2024_49504_MOESM9_ESM.pdf]

## Reporting Summary

Nature Portfolio wishes to improve the reproducibility of the work that we publish. This form provides structure for consistency and transparency in reporting. For further information on Nature Portfolio policies, see our [Editorial Policies](#) and the [Editorial Policy Checklist](#).

### Statistics

For all statistical analyses, confirm that the following items are present in the figure legend, table legend, main text, or Methods section.

n/a Confirmed

- The exact sample size ( $n$ ) for each experimental group/condition, given as a discrete number and unit of measurement
- A statement on whether measurements were taken from distinct samples or whether the same sample was measured repeatedly
- The statistical test(s) used AND whether they are one- or two-sided  
*Only common tests should be described solely by name; describe more complex techniques in the Methods section.*
- A description of all covariates tested
- A description of any assumptions or corrections, such as tests of normality and adjustment for multiple comparisons
- A full description of the statistical parameters including central tendency (e.g. means) or other basic estimates (e.g. regression coefficient) AND variation (e.g. standard deviation) or associated estimates of uncertainty (e.g. confidence intervals)
- For null hypothesis testing, the test statistic (e.g.  $F$ ,  $t$ ,  $r$ ) with confidence intervals, effect sizes, degrees of freedom and  $P$  value noted  
*Give  $P$  values as exact values whenever suitable.*
- For Bayesian analysis, information on the choice of priors and Markov chain Monte Carlo settings
- For hierarchical and complex designs, identification of the appropriate level for tests and full reporting of outcomes
- Estimates of effect sizes (e.g. Cohen's  $d$ , Pearson's  $r$ ), indicating how they were calculated

*Our web collection on [statistics for biologists](#) contains articles on many of the points above.*

### Software and code

Policy information about [availability of computer code](#)

Data collection

Data analysis 

For manuscripts utilizing custom algorithms or software that are central to the research but not yet described in published literature, software must be made available to editors and reviewers. We strongly encourage code deposition in a community repository (e.g. GitHub). See the Nature Portfolio [guidelines for submitting code & software](#) for further information.

## Data

Policy information about [availability of data](#)

All manuscripts must include a [data availability statement](#). This statement should provide the following information, where applicable:

- Accession codes, unique identifiers, or web links for publicly available datasets
- A description of any restrictions on data availability
- For clinical datasets or third party data, please ensure that the statement adheres to our [policy](#)

The RNA-seq data generated in this study have been deposited in the National Center for Biotechnology Information (NCBI) Sequence Read Archive database under accession PRJNA1040954, PRJNA1041073, PRJNA1041558. The RNA-seq data of rapeseed stem at 48 hours post-inoculation was acquired from the NCBI Sequence Read Archive database under accession SRP053361. The raw resequencing data of 418 rapeseed accessions from different breeding periods was acquired from the NCBI Sequence Read Archive database under accessions PRJNA416679.

## Research involving human participants, their data, or biological material

Policy information about studies with [human participants or human data](#). See also policy information about [sex, gender \(identity/presentation\), and sexual orientation](#) and [race, ethnicity and racism](#).

|                                                                    |                                  |
|--------------------------------------------------------------------|----------------------------------|
| Reporting on sex and gender                                        | <input type="text" value="n/a"/> |
| Reporting on race, ethnicity, or other socially relevant groupings | <input type="text" value="n/a"/> |
| Population characteristics                                         | <input type="text" value="n/a"/> |
| Recruitment                                                        | <input type="text" value="n/a"/> |
| Ethics oversight                                                   | <input type="text" value="n/a"/> |

Note that full information on the approval of the study protocol must also be provided in the manuscript.

## Field-specific reporting

Please select the one below that is the best fit for your research. If you are not sure, read the appropriate sections before making your selection.

- Life sciences       Behavioural & social sciences       Ecological, evolutionary & environmental sciences

For a reference copy of the document with all sections, see [nature.com/documents/nr-reporting-summary-flat.pdf](https://www.nature.com/documents/nr-reporting-summary-flat.pdf)

## Life sciences study design

All studies must disclose on these points even when the disclosure is negative.

|                 |                                                                                                                                                                                                                                                                                                                                                                                                                                                                                                                                                                                                                                                                                 |
|-----------------|---------------------------------------------------------------------------------------------------------------------------------------------------------------------------------------------------------------------------------------------------------------------------------------------------------------------------------------------------------------------------------------------------------------------------------------------------------------------------------------------------------------------------------------------------------------------------------------------------------------------------------------------------------------------------------|
| Sample size     | We used 322 rapeseed accessions for GWAS analysis. Other required experimental sample sizes were determined based on our previous studies (Wu et al., 2022, Lin et al., 2022).<br>Wu J, Yin SL, Lin L, et al. Host-induced gene silencing of multiple pathogenic factors of <i>Sclerotinia sclerotiorum</i> confers resistance to <i>Sclerotinia rot</i> in <i>Brassica napus</i> . <i>Crop J</i> , 2022, 10(3): 661-671.<br>Lin L, Fan JL, Li PP, et al. The <i>Sclerotinia sclerotiorum</i> -inducible promoter pBnGH17D7 in <i>Brassica napus</i> : isolation, characterization, and application in host-induced gene silencing. <i>J Exp Bot</i> , 2022, 73(19): 6663-6677. |
| Data exclusions | No data was excluded from our analysis.                                                                                                                                                                                                                                                                                                                                                                                                                                                                                                                                                                                                                                         |
| Replication     | All experiments were repeated 3-4 times, and we have stated the number of replications in the corresponding figure legends and methods section.                                                                                                                                                                                                                                                                                                                                                                                                                                                                                                                                 |
| Randomization   | For in-field studies, all rapeseed plants were planted in randomized blocks.                                                                                                                                                                                                                                                                                                                                                                                                                                                                                                                                                                                                    |
| Blinding        | Data collection and analysis were performed in a blinded manner.                                                                                                                                                                                                                                                                                                                                                                                                                                                                                                                                                                                                                |

## Reporting for specific materials, systems and methods

We require information from authors about some types of materials, experimental systems and methods used in many studies. Here, indicate whether each material, system or method listed is relevant to your study. If you are not sure if a list item applies to your research, read the appropriate section before selecting a response.

## Materials &amp; experimental systems

## Methods

| n/a                                 | Involvement                                            |
|-------------------------------------|--------------------------------------------------------|
| <input type="checkbox"/>            | <input checked="" type="checkbox"/> Antibodies         |
| <input checked="" type="checkbox"/> | <input type="checkbox"/> Eukaryotic cell lines         |
| <input checked="" type="checkbox"/> | <input type="checkbox"/> Palaeontology and archaeology |
| <input checked="" type="checkbox"/> | <input type="checkbox"/> Animals and other organisms   |
| <input checked="" type="checkbox"/> | <input type="checkbox"/> Clinical data                 |
| <input checked="" type="checkbox"/> | <input type="checkbox"/> Dual use research of concern  |
| <input type="checkbox"/>            | <input checked="" type="checkbox"/> Plants             |

| n/a                                 | Involvement                                     |
|-------------------------------------|-------------------------------------------------|
| <input checked="" type="checkbox"/> | <input type="checkbox"/> ChIP-seq               |
| <input checked="" type="checkbox"/> | <input type="checkbox"/> Flow cytometry         |
| <input checked="" type="checkbox"/> | <input type="checkbox"/> MRI-based neuroimaging |

## Antibodies

## Antibodies used

The commercialized antibodies were ordered from the Cowin Bio, MBL, TransGen Biotech, Cell Signaling Technology, Millipore and Sigma Aldrich. The catalog number and the specific information are listed below: anti-GST antibody (Cowin Bio, CW0084, 1:1,000 dilution), anti-His antibody (Cowin Bio, CW0285, 1:1,000 dilution), anti-Myc antibody (MBL, M192-3S, 1:1,000 dilution), anti-DDDDK tag antibody (MBL, M185-3L, 1:1,000 dilution), anti- $\beta$ -Actin antibody (TransGen Biotech, HC201-01, 1:1,000 dilution), anti-pTEpY antibody (Cell Signaling Technology, 9101S, 1:1,000 dilution), anti-pMBP antibody (Millipore, 05-429, 1:1,000 dilution), and the anti-MBP antibody (Sigma Aldrich, M3821, 1:1,000 dilution). The anti-BnaMPK3, anti-BnaMPK6 and anti-BnaMCK9 antibodies used in this study were provided by Kaijing Biotech (Shanghai, China).

## Validation

The specificities of the commercialized antibodies can be found in the manufacturers' websites, listed as follows:  
 anti-GST antibody (Cowin Bio, CW0084): <https://www.cwbio.com/goods/index/id/10104>.  
 anti-His antibody (Cowin Bio, CW0285): <https://www.cwbio.com/goods/index/id/10177>.  
 anti-Myc antibody (MBL, M192-3S): <https://www.mblbio.com/bio/g/dtl/A/?pcd=M192-3>.  
 anti-DDDDK tag antibody (MBL, M185-3L): <https://www.mblbio.com/bio/g/dtl/A/index.html?pcd=M185-3L>.  
 anti- $\beta$ -Actin antibody (TransGen Biotech, HC201-01): [https://www.transgen.com/antibody\\_reference/393.html](https://www.transgen.com/antibody_reference/393.html).  
 anti-pTEpY antibody (Cell Signaling Technology, 9101S): <https://www.cellsignal.cn/products/primary-antibodies/phospho-p44-42-mapk-erk1-2-thr202-tyr204-antibody/9101>.  
 anti-pMBP antibody (Millipore, 05-429): <https://www.sigmaaldrich.cn/CN/zh/product/mm/05429>.  
 anti-MBP antibody (Sigma Aldrich, M3821): <https://www.sigmaaldrich.cn/CN/zh/product/sigma/m3821>.  
 anti-BnaMPK3 antibody (Kaijing Biotech): for detecting endogenous BnaMPK3 in rapeseed as shown in Fig. 4i and supplementary Fig. 13.  
 anti-BnaMPK6 antibody (Kaijing Biotech): for detecting endogenous BnaMPK6 in rapeseed as shown in Fig. 4i and supplementary Fig. 13.  
 anti-BnaA07.MKK9 antibody (Kaijing Biotech): for detecting endogenous anti-BnaA07.MKK9 in rapeseed as shown in Fig. 1f, g and Fig. 6d.

## Dual use research of concern

Policy information about [dual use research of concern](#)

## Hazards

Could the accidental, deliberate or reckless misuse of agents or technologies generated in the work, or the application of information presented in the manuscript, pose a threat to:

| No                                  | Yes                                                 |
|-------------------------------------|-----------------------------------------------------|
| <input checked="" type="checkbox"/> | <input type="checkbox"/> Public health              |
| <input checked="" type="checkbox"/> | <input type="checkbox"/> National security          |
| <input checked="" type="checkbox"/> | <input type="checkbox"/> Crops and/or livestock     |
| <input checked="" type="checkbox"/> | <input type="checkbox"/> Ecosystems                 |
| <input checked="" type="checkbox"/> | <input type="checkbox"/> Any other significant area |

## Experiments of concern

Does the work involve any of these experiments of concern:

| No                                  | Yes                      |                                                                             |
|-------------------------------------|--------------------------|-----------------------------------------------------------------------------|
| <input checked="" type="checkbox"/> | <input type="checkbox"/> | Demonstrate how to render a vaccine ineffective                             |
| <input checked="" type="checkbox"/> | <input type="checkbox"/> | Confer resistance to therapeutically useful antibiotics or antiviral agents |
| <input checked="" type="checkbox"/> | <input type="checkbox"/> | Enhance the virulence of a pathogen or render a nonpathogen virulent        |
| <input checked="" type="checkbox"/> | <input type="checkbox"/> | Increase transmissibility of a pathogen                                     |
| <input checked="" type="checkbox"/> | <input type="checkbox"/> | Alter the host range of a pathogen                                          |
| <input checked="" type="checkbox"/> | <input type="checkbox"/> | Enable evasion of diagnostic/detection modalities                           |
| <input checked="" type="checkbox"/> | <input type="checkbox"/> | Enable the weaponization of a biological agent or toxin                     |
| <input checked="" type="checkbox"/> | <input type="checkbox"/> | Any other potentially harmful combination of experiments and agents         |

## Plants

|                       |                                                                                                                                                                                                                                                                                                                                                                                                                                   |
|-----------------------|-----------------------------------------------------------------------------------------------------------------------------------------------------------------------------------------------------------------------------------------------------------------------------------------------------------------------------------------------------------------------------------------------------------------------------------|
| Seed stocks           | Arabidopsis T-DNA insertion mutant which from prior publication were listed the manuscript and others were obtained from the Arabidopsis Biological Resource Center. All seeds were stored in our laboratory.                                                                                                                                                                                                                     |
| Novel plant genotypes | BnaA07.MKK9DD-OE, BnaC03.MPK3-OE, BnaC03.MPK6-OE, Bnamkk9 knock out mutant, BnaC03.MPK3-OE/Bnamkk9 and BnaC03.MPK6-OE/Bnamkk9 were generated by Agrobacterium-mediated hypocotyl method as described in manuscript. The Csv::BnaA07.MKK9DD transgenic Arabidopsis plants were generated by <i>A. tumefaciens</i> -mediated floral dipping as described in manuscript. The Csv::BnaA07.MKK9DD/AtMPK3SR were generated by crossing. |
| Authentication        | The transcript abundance of the OE lines was detected by RT-PCR or RT-qPCR. The T-DNA insertion mutant was validated with T-DNA border primers and gene-specific primers. The Bnamkk9 KO mutants were identified by PCR and Sanger sequencing.                                                                                                                                                                                    |
